# Supplementary material for: Monolayer/Bilayer Equilibrium of Phospholipids in Gel or Liquid States: Interfacial Adsorption via Monomer or Liposome Diffusion?
Source: MDPI journal article supplement (doi:10.3390/gels9100803), 2023-10-06
Supplement: s1 [file s1]

# Monolayer/Bilayer equilibrium of Phospholipids in gel or liquid states: Interfacial Adsorption via Monomer or Liposome diffusion?

Kirsten Ullmann <sup>1,\*</sup>, Lea Facht <sup>1</sup>, Hermann Nirschl <sup>1</sup> and Gero Leneweit <sup>2,\*</sup>

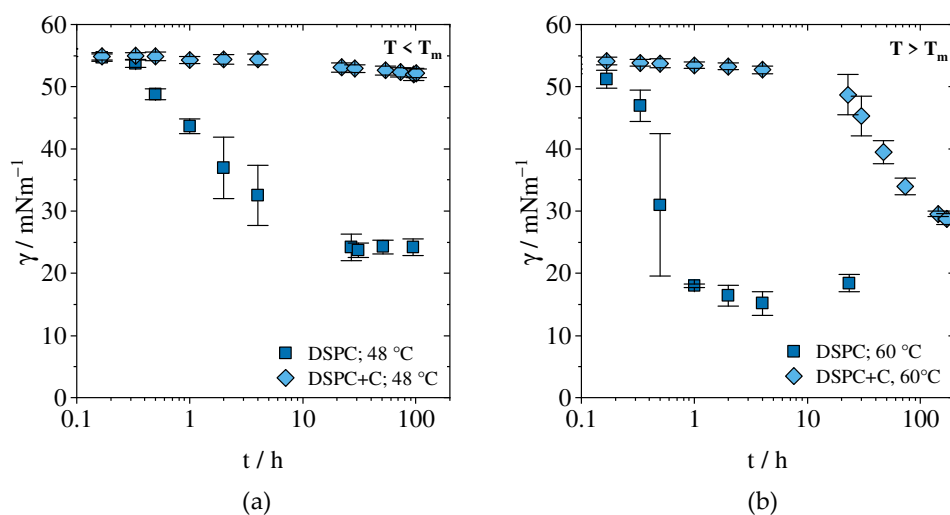

**Figure S1:** Interfacial tension  $\gamma$  as a function of time  $t$  in dependence of the temperature for the pure phospholipid DSPC and in a mixture with cholesterol (DSPC+C = 60:40 mol-%) at a concentration of 0.1 mM. (a) Evolution towards the quasi-equilibrium  $\gamma_\epsilon$  below the transition temperature of DSPC. (b): Evolution towards the quasi-equilibrium  $\gamma_\epsilon$  above the transition temperature of DSPC.

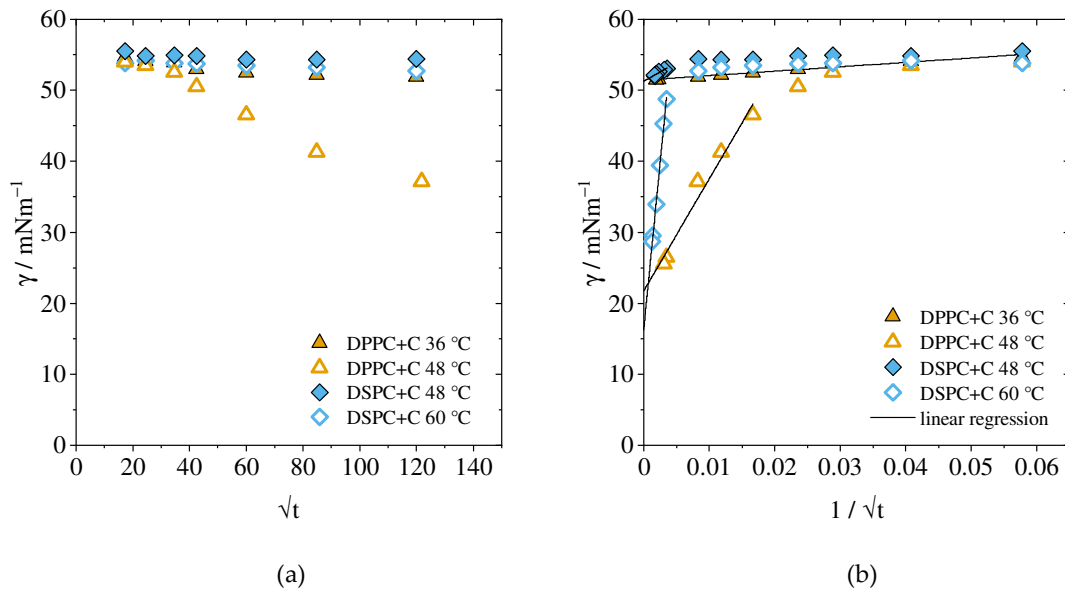

**Figure S2:** (a) Plot of interfacial tension  $\gamma(t)$  versus  $\sqrt{t}$  to determine the diffusion coefficient of the mixtures DPPC+C and DSPC+C below and above the transition temperature at a concentration of 0.1 mM. (b) plot of interfacial tension  $\gamma(t)$  vs.  $1/\sqrt{t}$  to determine the equilibrium interfacial tension by extrapolation for the mixture DPPC+C and DSPC+C below and above the transition temperature, respectively, at a concentration of 0.1 mM each.
